# Supplementary material
Source: MDPI journal article supplement (https://www.mdpi.com/2312-7481/7/12/153)
Supplement: s1 [file s1]

Supplementary Material

# Syntheses, Structures and Magnetic Properties of $M_2$ ( $M = Fe, Co$ ) Complexes with $N_6$ coordination environment: Field-Induced Slow Magnetic Relaxation in $Co_2$

Qianqian Yang <sup>1,2</sup>, Xiao-Lei Li <sup>1</sup> and Jinkui Tang <sup>1,2,\*</sup>

<sup>1</sup> State Key Laboratory of Rare Earth Resource Utilization, Changchun Institute of Applied Chemistry, Chinese Academy of Sciences, Changchun, China; [yqq@ciac.ac.cn](mailto:yqq@ciac.ac.cn) (Q.Y.); [lixl@ciac.ac.cn](mailto:lixl@ciac.ac.cn) (X.L.); [tang@ciac.ac.cn](mailto:tang@ciac.ac.cn) (J.T.)

<sup>2</sup> School of Applied Chemistry and Engineering, University of Science and Technology of China, Hefei, China

\* Correspondence: [tang@ciac.ac.cn](mailto:tang@ciac.ac.cn)

## Contents:

- S1.  $^1H$ -NMR spectrum
- S2. IR spectroscopy
- S3. Crystallographic data
- S4. Structural details of complexes
- S5. Coordination Geometry
- S6. Packing model
- S7. Powder-XRD analysis
- S8. Magnetic susceptibility measurement

**Citation:** Yang, Q.; Li X.-L.; Tang, J. Title. *Magnetochemistry* **2021**, *7*, 153.  
<https://doi.org/10.3390/magnetochemistry7120153>

Academic Editor: Firstname Last-name

Received: date

Accepted: date

Published: date

**Publisher's Note:** MDPI stays neutral with regard to jurisdictional claims in published maps and institutional affiliations.

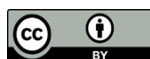

**Copyright:** © 2021 by the authors. Submitted for possible open access publication under the terms and conditions of the Creative Commons Attribution (CC BY) license (<https://creativecommons.org/licenses/by/4.0/>).

## S1. <sup>1</sup>H-NMR spectrum

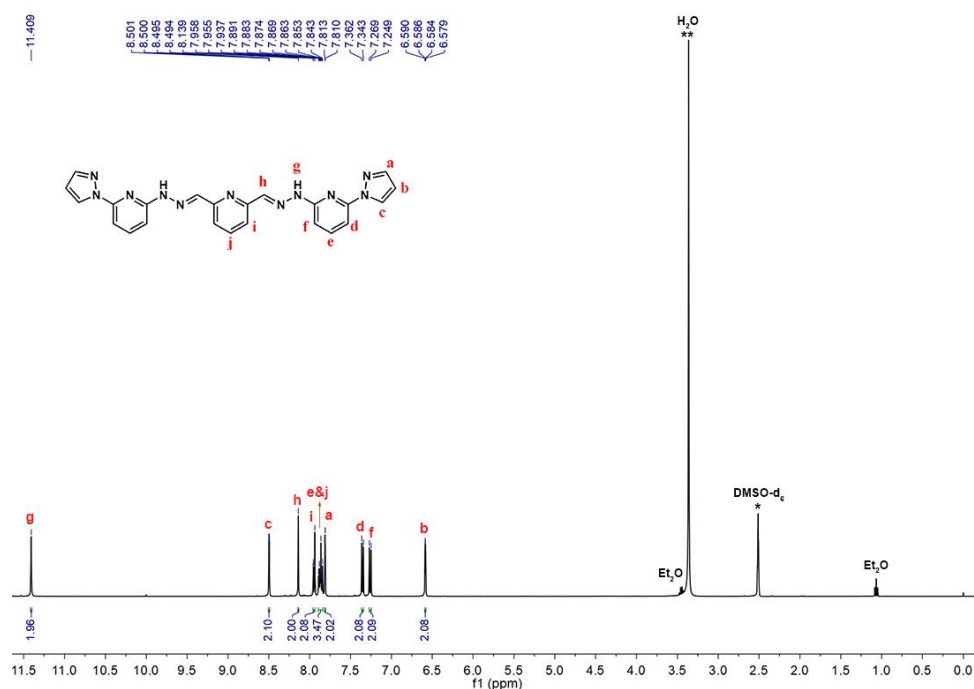

Figure S1. <sup>1</sup>H-NMR spectrum of H<sub>2</sub>L in DMSO-d<sub>6</sub> at room temperature.

## S2. IR spectroscopy

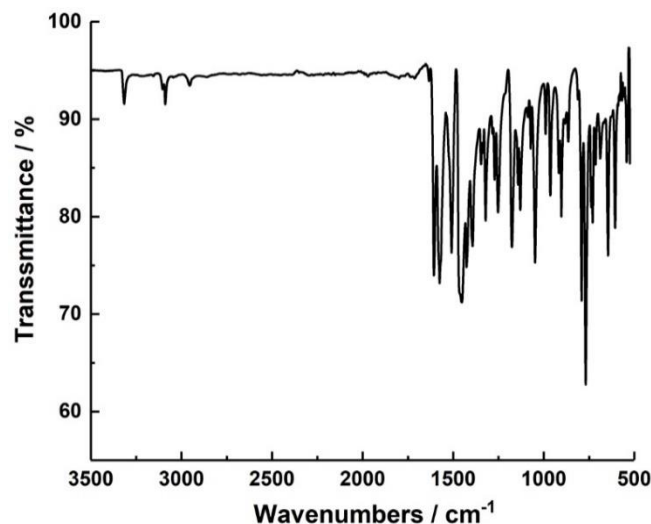

Figure S2. IR spectrum of H<sub>2</sub>L.

Selected IR for **Co**: (solid, ATR)  $\tilde{\nu}$ (cm<sup>-1</sup>): 549 (w), 576 (w), 590 (m), 617 (m), 649 (w), 680 (m), 711 (m), 752 (m), 790 (m), 885 (m), 910 (m), 941 (m), 989 (s), 1014 (s), 1052 (s), 1151 (w), 1164 (m), 1178 (m), 1199 (w), 1218 (w), 1251 (m), 1274 (m), 1297 (w), 1322 (m), 1348 (m), 1405 (m), 1417 (m), 1459 (s), 1486 (m), 1508 (m), 1529 (m), 1579 (m), 1604 (m), 1623 (m), 3041 (w), 3089 (w), 3128 (w), 3236 (w).

Selected IR for **Fe**: (solid, ATR)  $\tilde{\nu}$ (cm<sup>-1</sup>): 549 (w), 574 (w), 592 (m), 649 (m), 680 (m), 707 (w), 730 (m), 757 (m), 788 (m), 883 (m), 916 (m), 941 (m), 987 (s), 1010 (s), 1056 (s), 1091 (s), 1178 (m), 1220 (w), 1251 (m), 1272 (m), 1295 (w), 1321 (m), 1344 (m), 1361 (m), 1396 (m),

1415 (m), 1456 (s), 1486 (m), 1519 (s), 1562 (m), 1577 (m), 1604 (m), 1627 (m), 3106 (w), 3122 (w), 3135 (w), 3255 (w).

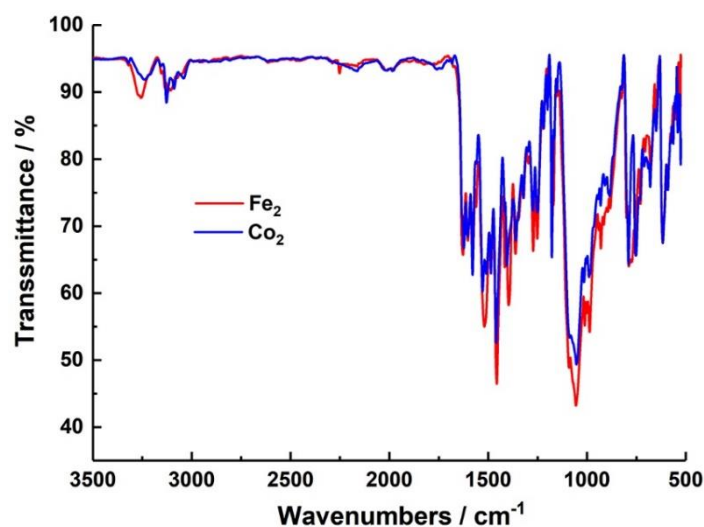

Figure S3. IR spectra of complexes Co<sub>2</sub> (blue curve) and Fe<sub>2</sub> (red curve).

### S3. Crystallographic data

Table S1. Crystallographic data of Co<sub>2</sub> and Fe<sub>2</sub>.

| Complexes                                                   | Co <sub>2</sub>                                                                                 | Fe <sub>2</sub>                                                                                 |
|-------------------------------------------------------------|-------------------------------------------------------------------------------------------------|-------------------------------------------------------------------------------------------------|
| Formula                                                     | C <sub>50</sub> H <sub>44</sub> Cl <sub>4</sub> Co <sub>2</sub> N <sub>24</sub> O <sub>16</sub> | C <sub>50</sub> H <sub>44</sub> Cl <sub>4</sub> Fe <sub>2</sub> N <sub>24</sub> O <sub>16</sub> |
| Mr [g·mol <sup>-1</sup> ]                                   | 1496.75                                                                                         | 1490.59                                                                                         |
| Crystal system                                              | triclinic                                                                                       | triclinic                                                                                       |
| Space group                                                 | <i>P</i> $\bar{1}$                                                                              | <i>P</i> $\bar{1}$                                                                              |
| Color                                                       | Red                                                                                             | Red                                                                                             |
| <i>T</i> [K]                                                | 173.0                                                                                           | 180.0                                                                                           |
| <i>a</i> [Å]                                                | 12.1016(8)                                                                                      | 12.1120(5)                                                                                      |
| <i>b</i> [Å]                                                | 12.3889(9)                                                                                      | 12.4270(5)                                                                                      |
| <i>c</i> [Å]                                                | 12.4089(8)                                                                                      | 12.4514(5)                                                                                      |
| $\alpha$ [°]                                                | 82.929(2)                                                                                       | 82.9570(1)                                                                                      |
| $\beta$ [°]                                                 | 94.149(3)                                                                                       | 61.5120(1)                                                                                      |
| $\gamma$ [°]                                                | 64.572(2)                                                                                       | 64.5770(1)                                                                                      |
| <i>V</i> [Å <sup>3</sup> ]                                  | 61.680(2)                                                                                       | 1479.71(1)                                                                                      |
| <i>Z</i>                                                    | 1                                                                                               | 1                                                                                               |
| $\rho_{\text{calcd}}$ [g·cm <sup>-3</sup> ]                 | 1.689                                                                                           | 1.673                                                                                           |
| $\mu$ (Mo-K $\alpha$ ) [mm <sup>-1</sup> ]                  | 0.838                                                                                           | 0.763                                                                                           |
| <i>F</i> (000)                                              | 762.0                                                                                           | 760.0                                                                                           |
| 2 $\theta$ range [°]                                        | 4.124 to 52.112                                                                                 | 3.742 to 50.076                                                                                 |
| Reflns collected                                            | 33680                                                                                           | 31461                                                                                           |
| Unique reflns                                               | 5807                                                                                            | 5216                                                                                            |
| <i>R</i> <sub>int</sub>                                     | 0.0619                                                                                          | 0.0604                                                                                          |
| GOF                                                         | 1.087                                                                                           | 1.146                                                                                           |
| <i>R</i> <sub>1</sub> [ <i>I</i> ≥ 2 $\sigma$ ( <i>I</i> )] | 0.0392                                                                                          | 0.0422                                                                                          |
| <i>wR</i> <sub>2</sub> (all data)                           | 0.1086                                                                                          | 0.1249                                                                                          |

$$R_1 = \sum (|F_o| - |F_c|) / \sum |F_o|; \quad \omega R_2 = \left[ \sum \omega (|F_o| - |F_c|)^2 / \sum \omega F_o^2 \right]^{1/2}$$

#### S4. Structural details of complexes

**Table S2.** Selected bond distances (Å) and angles (°) of **Co2** and **Fe2**.

| Co2                                  |           | Fe2                                   |            |
|--------------------------------------|-----------|---------------------------------------|------------|
| Co1-N1 <sup>1</sup>                  | 2.144(3)  | Fe1-N1                                | 2.181(3)   |
| Co1-N3 <sup>1</sup>                  | 2.046(2)  | Fe1-N3                                | 2.105(3)   |
| Co1-N5 <sup>1</sup>                  | 2.250(2)  | Fe1-N5                                | 2.267(3)   |
| Co1-N7                               | 2.190(2)  | Fe1-N7 <sup>1</sup>                   | 2.226(3)   |
| Co1-N9                               | 2.056(2)  | Fe1-N9 <sup>1</sup>                   | 2.110(3)   |
| Co1-N11                              | 2.159(3)  | Fe1-N11 <sup>1</sup>                  | 2.196(3)   |
| N1 <sup>1</sup> -Co1-N5 <sup>1</sup> | 149.85(9) | N1-Fe1-N5                             | 146.33(10) |
| N1 <sup>1</sup> -Co1-N7              | 87.42(9)  | N1-Fe1-N7 <sup>1</sup>                | 87.44(10)  |
| N1 <sup>1</sup> -Co1-N11             | 103.28(1) | N1-Fe1-N11 <sup>1</sup>               | 104.81(11) |
| N3 <sup>1</sup> -Co1-N1 <sup>1</sup> | 75.97(9)  | N3-Fe1-N1                             | 73.85(10)  |
| N3 <sup>1</sup> -Co1-N5 <sup>1</sup> | 74.17(9)  | N3-Fe1-N5                             | 72.80(10)  |
| N3 <sup>1</sup> -Co1-N7              | 109.91(9) | N3-Fe1-N7 <sup>1</sup>                | 111.10(10) |
| N3 <sup>1</sup> -Co1-N9              | 172.67(1) | N3-Fe1-N9 <sup>1</sup>                | 172.73(10) |
| N3 <sup>1</sup> -Co1-N11             | 101.03(1) | N3-Fe1-N11 <sup>1</sup>               | 102.65(11) |
| N7-Co1-N5 <sup>1</sup>               | 98.80(9)  | N7 <sup>1</sup> -Fe1-N5               | 100.23(10) |
| N9-Co1-N1 <sup>1</sup>               | 98.90(9)  | N9 <sup>1</sup> -Fe1-N1               | 101.16(10) |
| N9-Co1-N5 <sup>1</sup>               | 111.21(9) | N9 <sup>1</sup> -Fe1-N5               | 112.47(10) |
| N9-Co1-N7                            | 74.72(9)  | N9 <sup>1</sup> -Fe1-N7 <sup>1</sup>  | 73.48(10)  |
| N9-Co1-N11                           | 74.82(1)  | N9 <sup>1</sup> -Fe1-N11 <sup>1</sup> | 73.22(11)  |
| N11-Co1-N5 <sup>1</sup>              | 86.52(1)  | N11 <sup>1</sup> -Fe1-N5              | 86.95(11)  |
| N11-Co1-N7                           | 148.91(1) | N11 <sup>1</sup> -Fe1-N7 <sup>1</sup> | 146.15(11) |

<sup>1</sup>2-X,1-Y,1-Z

#### S5. Coordination geometry

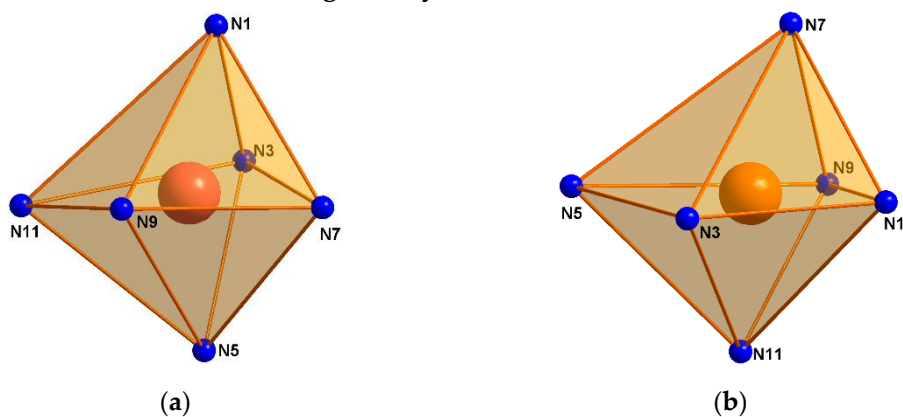

**Figure S4.** Coordination polyhedrons of Co<sup>II</sup> (left) and Fe<sup>II</sup> (right) in complexes **Co2** and **Fe2**. Color code: Co<sup>II</sup>, orange-red; Fe<sup>II</sup>, orange; N, blue.

**Table S3.** The *CSHM* values calculated by SHAPE 2.1 of Co<sup>II</sup> and Fe<sup>II</sup> ions in Co<sub>2</sub> and Fe<sub>2</sub>.

| Coordination Geometry                         | Co     | Fe     |
|-----------------------------------------------|--------|--------|
| Hexagon ( $D_{6h}$ )                          | 30.305 | 28.793 |
| Pentagonal pyramid ( $C_{5v}$ )               | 18.964 | 18.416 |
| Octahedron ( $O_h$ )                          | 5.369  | 6.344  |
| Trigonal prism ( $D_{3h}$ )                   | 8.404  | 8.371  |
| Johnson pentagonal pyramid $J_2$ ( $C_{5v}$ ) | 22.955 | 22.358 |

**S6. Packing model**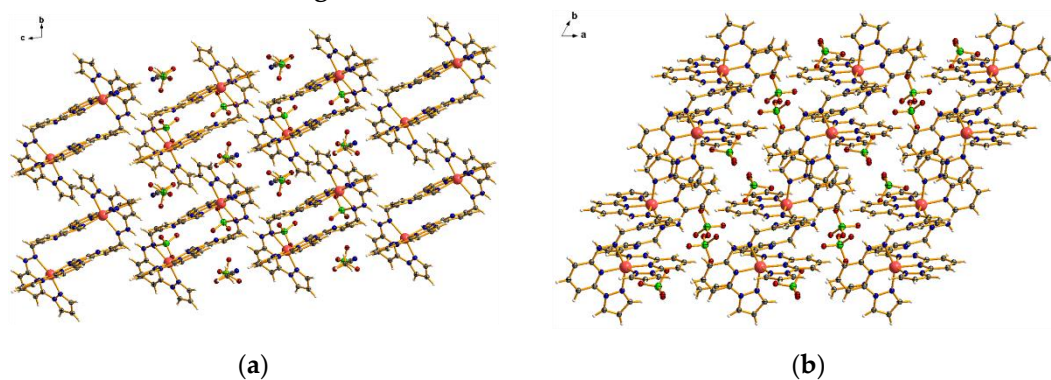**Figure S5.** Packing model along the *a* and *c* axes of complex Co<sub>2</sub>. Color code: Co<sup>II</sup>, orange-red; N, blue; C, gray; O, red; Cl, bright green; H, white.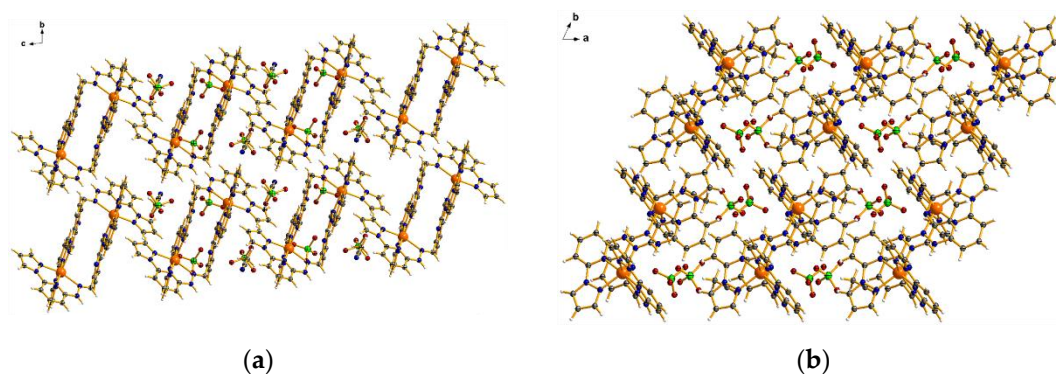**Figure S6.** Packing model along the *a* and *c* axes of complex Fe<sub>2</sub>. Color code: Fe<sup>II</sup>, orange; N, blue; C, gray; O, red; Cl, bright green; H, white.**S7. Powder-XRD analyses**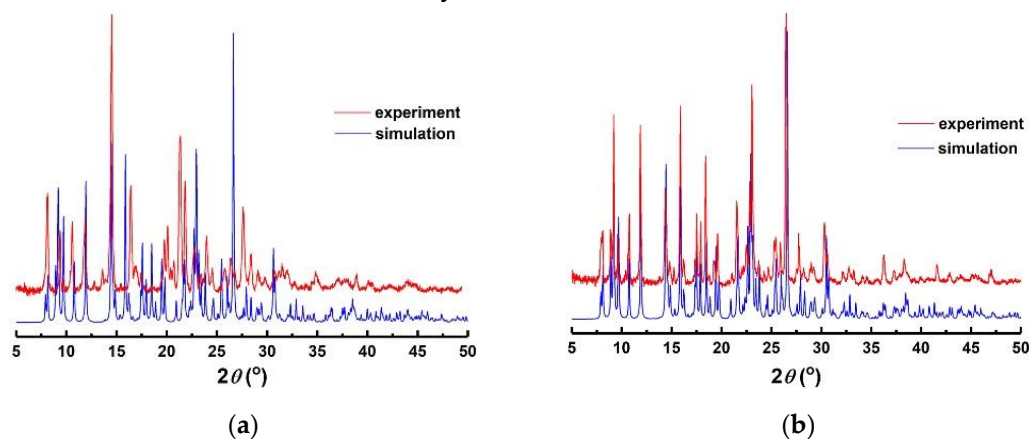**Figure S7.** Powder-XRD analyses of complexes Co<sub>2</sub> and Fe<sub>2</sub>. The blue lines are simulated by single crystal data.

### S8. Magnetic susceptibility measurement

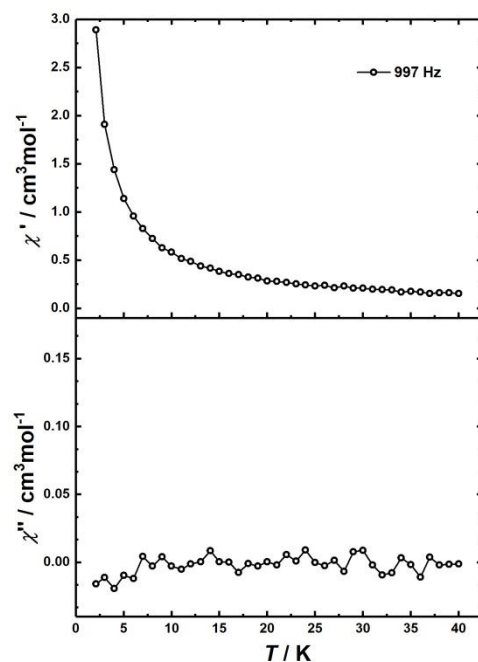

Figure S8. Temperature-dependent ac susceptibility of **Co**<sub>2</sub> under 0 Oe dc field.

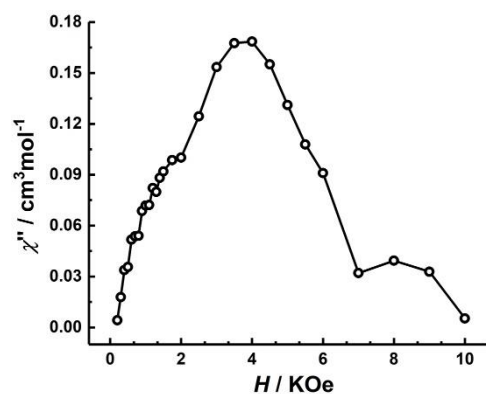

Figure S9. Field-dependent ac susceptibility of **Co**<sub>2</sub> at 1.9 K with ac frequency of 997 Hz.

Table S4. Parameters for the best fit of frequency-dependent ac susceptibility of **Co**<sub>2</sub> under 3500 Oe dc field.

| $T / \text{K}$ | $\chi_{S,tot}$ | $\Delta\chi_1$ | $\tau_1 / \text{s}$ | $\alpha_1$  | $\Delta\chi_2$ | $\tau_2 / \text{s}$ | $\alpha_2$ | Residual   |
|----------------|----------------|----------------|---------------------|-------------|----------------|---------------------|------------|------------|
| 1.9            | 3.9142E-23     | 1.52999        | 0.22852             | 1.18103E-15 | 0.91746        | 0.00113             | 0.322      | 0.01503    |
| 2.2            | 7.58546E-23    | 1.19439        | 0.16888             | 1.43037E-15 | 1.00823        | 9.60745E-4          | 0.26601    | 0.0284     |
| 2.5            | 9.73326E-23    | 0.86095        | 0.14367             | 1.97141E-15 | 1.15141        | 9.95134E-4          | 0.21743    | 0.01406    |
| 3.0            | 1.14254E-22    | 0.45612        | 0.12313             | 3.18189E-15 | 1.28076        | 8.94003E-4          | 0.20257    | 0.00691    |
| 3.5            | 2.86916E-22    | 0.23226        | 0.11278             | 2.12437E-15 | 1.29226        | 7.01787E-4          | 0.15632    | 0.00772    |
| 4.0            | 6.20395E-22    | 0.1171         | 0.11026             | 2.39422E-15 | 1.24048        | 5.2808E-4           | 0.12195    | 0.00533    |
| 4.5            | 1.28678E-21    | 0.06296        | 0.13693             | 2.59157E-15 | 1.16561        | 3.74276E-4          | 0.11159    | 0.00132    |
| 5.0            | 8.24386E-22    | 0.03445        | 0.14876             | 6.10415E-15 | 1.08299        | 2.54585E-4          | 0.0922     | 0.00104    |
| 6.0            | 2.18471E-21    | 0.01334        | 0.13016             | 6.06514E-15 | 0.92773        | 1.05117E-4          | 0.06157    | 0.00185    |
| 7.0            | 5.83233E-23    | 0.02416        | 0.23616             | 3.30722E-28 | 0.80705        | 4.44762E-5          | 0.04719    | 8.65002E-4 |
| 8.0            | 1.41642E-22    | 0.00572        | 0.08477             | 1.50287E-31 | 0.70619        | 1.83869E-5          | 0.04856    | 0.00143    |
